# Supplementary material for: Evaluation of reference genes for real-time quantitative PCR analysis in southern corn rootworm, Diabrotica undecimpunctata howardi (Barber)
Source: PubMed Central journal article supplement (PMC6656754; doi:10.1038/s41598-019-47020-y), 2019-07-24
Supplement: 41598_2019_47020_MOESM1_ESM.pdf [file 41598_2019_47020_MOESM1_ESM.pdf]

1 **Evaluation of reference genes for real-time quantitative PCR analysis in southern corn**  
2 **rootworm, *Diabrotica undecimpunctata howardi* (Barber)**

3

4 Saumik Basu <sup>a</sup>, Adriano E. Pereira <sup>a,\*</sup>, Daniele H. Pinheiro <sup>c</sup>, Haichuan Wang <sup>d</sup>, Arnubio Valencia-  
5 Jiménez <sup>e</sup>, Blair D. Siegfried <sup>f</sup>, Joe Louis <sup>a,b</sup>, Xuguo ‘Joe’ Zhou <sup>g</sup>, and Ana Maria Vélez <sup>a</sup>

6 (Saumik Basu and Adriano E. Pereira contributed equally to the manuscript)

7

8 <sup>a</sup> Department of Entomology, University of Nebraska-Lincoln, Lincoln, NE 68583

9 <sup>b</sup> Department of Biochemistry, University of Nebraska-Lincoln, Lincoln, NE 68583

10 <sup>c</sup> Federal University of Lavras, Lavras, MG, Brazil

11 <sup>d</sup> Department of Agronomy and Horticulture, University of Nebraska-Lincoln, Lincoln, NE, 68583-  
12 0915

13

14 **Supporting information**

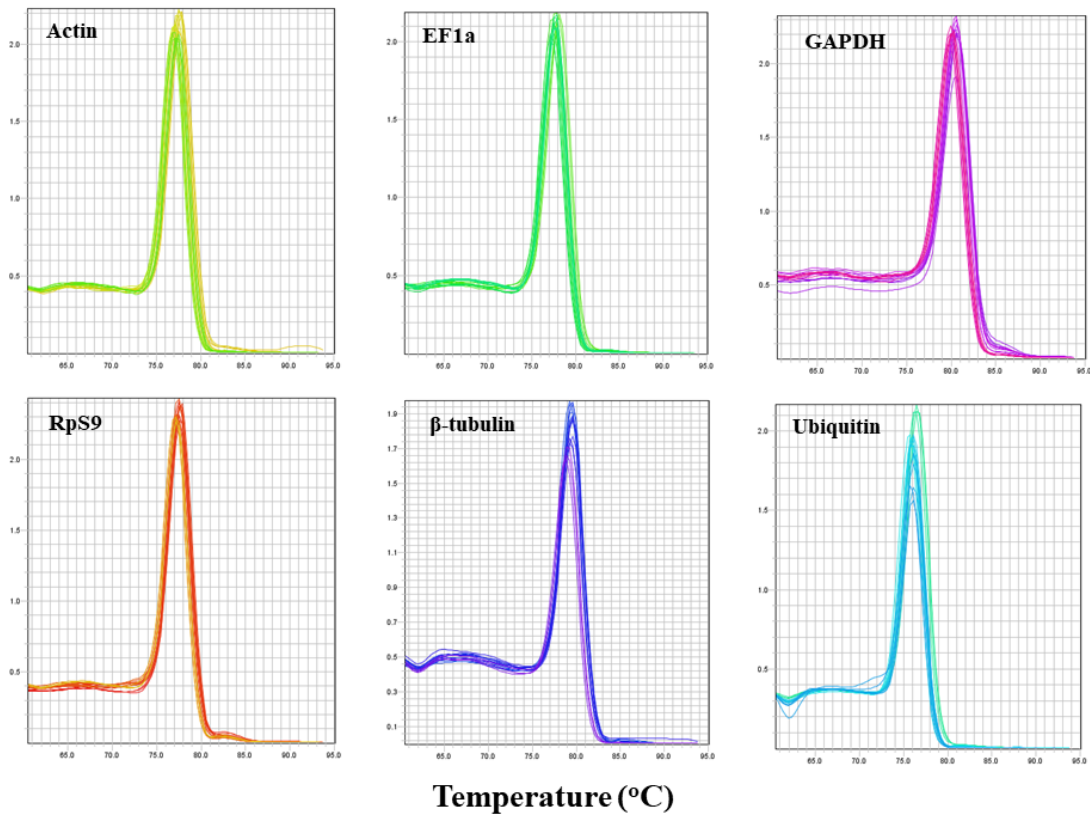

15

16 **Supplemental Figure 1.** Melting curve analyses showing the presence of single peak for the six  
17 genes evaluated (*Actin*, *EF1 $\alpha$* , *GAPDH*, *RpS9*, *Tubulin* and *Ubi*) in SCR which confirmed RT-  
18 qPCR amplification by their specific primers.

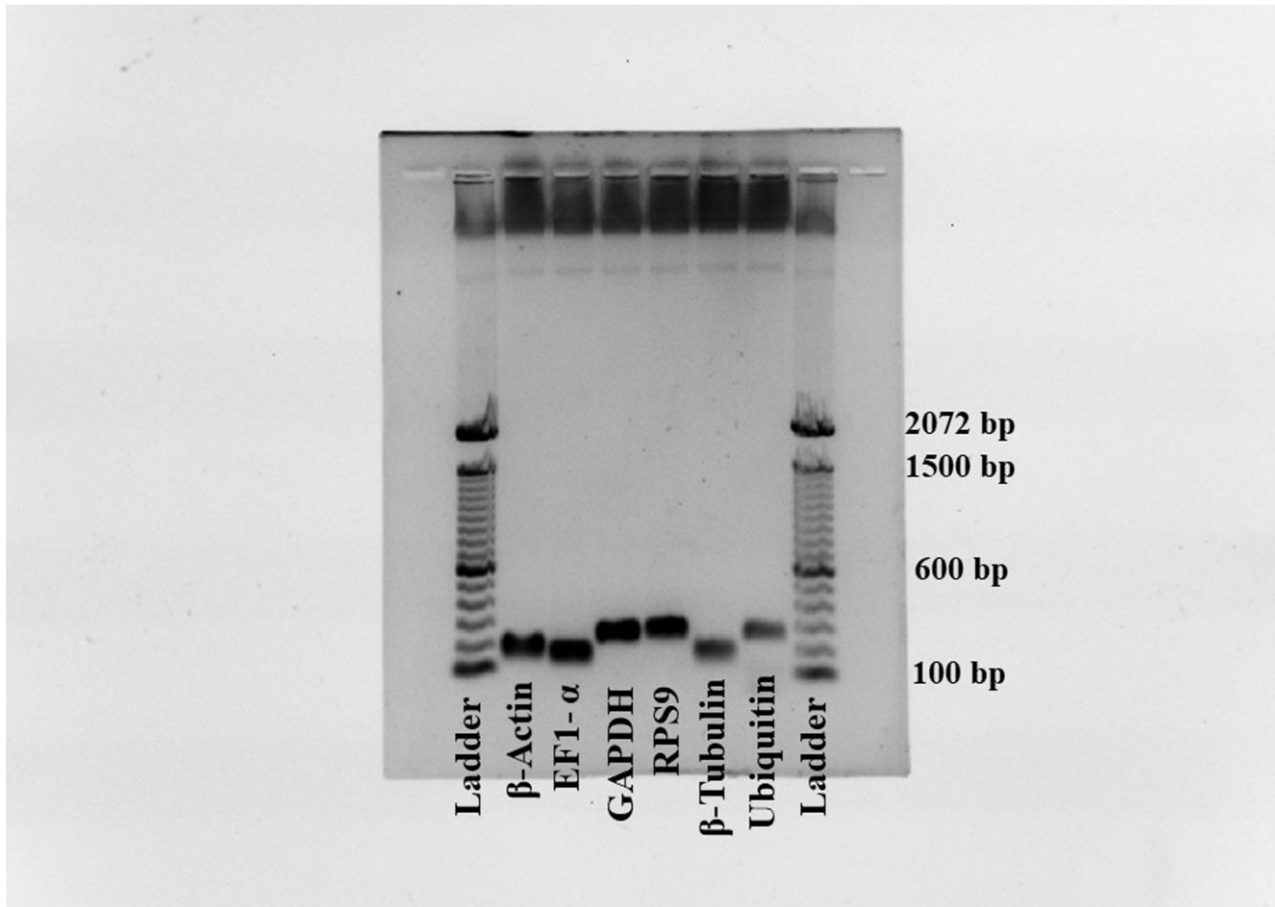

20

21 **Supplemental Figure 2.** PCR amplification of six SCR HKGs, *Actin*, *EF1 $\alpha$* , *GAPDH*, *RpS9*,22 *Tubulin* and *Ubi* using gene-specific primers.

23

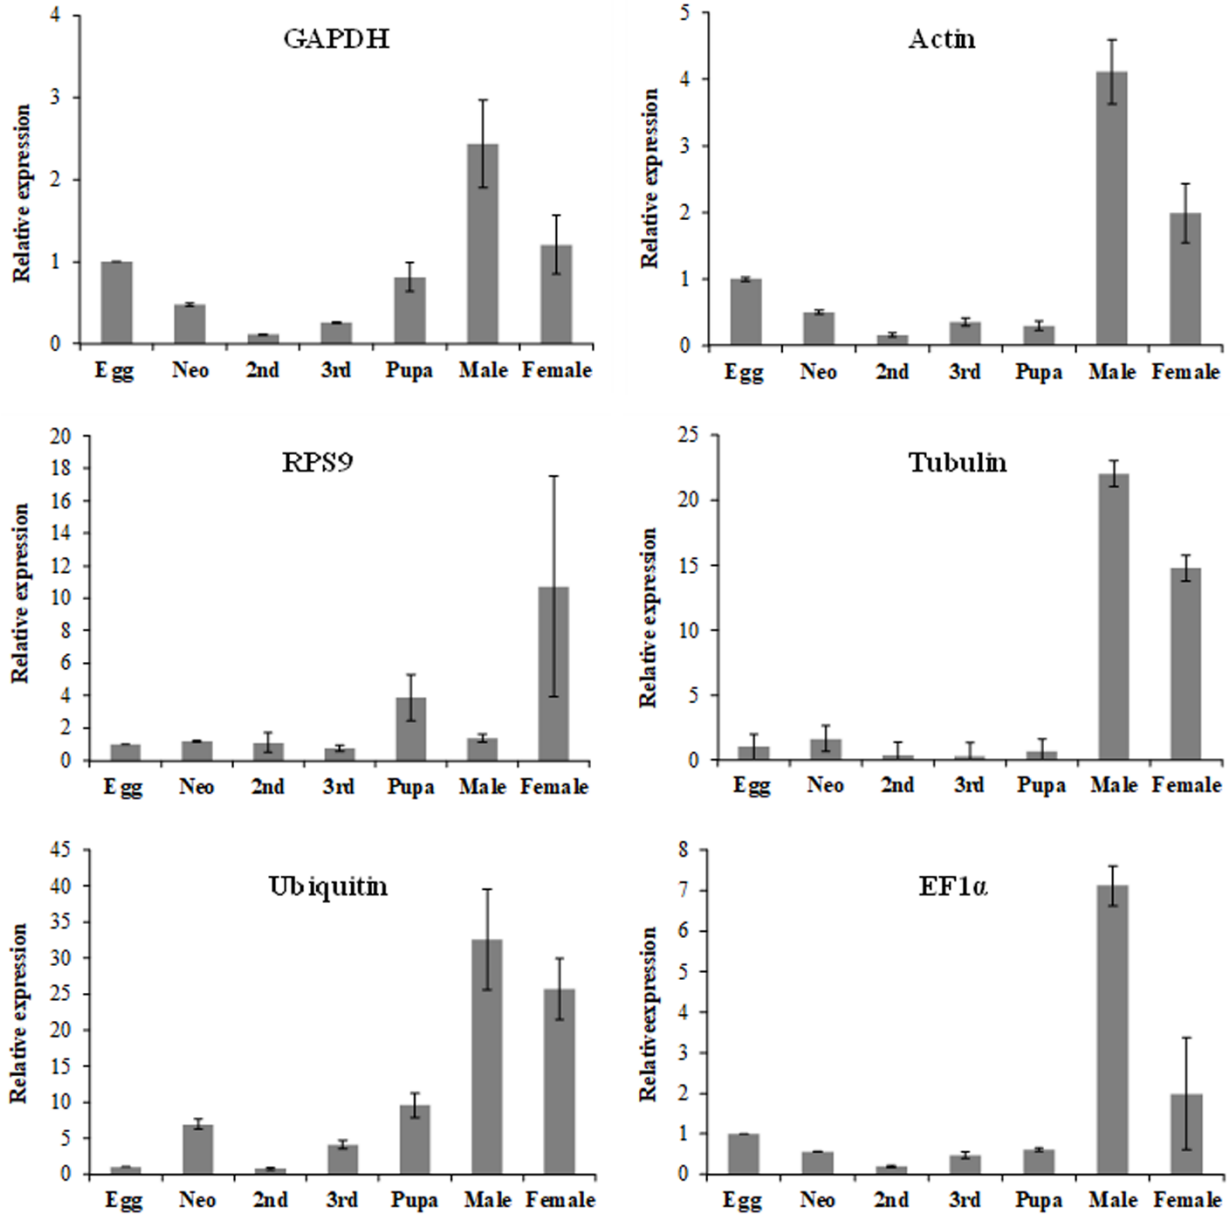

24

25 **Supplemental Figure 3.** Relative gene expression of SCR HKGs *Actin*, *EF1α*, *GAPDH*, *RpS9*,

26 *Tubulin* and *Ubi* performed in the different life stages egg, neonate, second instar, third instar,

27 pupa, adult male and female, using RT-qPCR.

28

29
